# Supplementary material
Source: PubMed Central journal article supplement (PMC3158150)
Supplement: 1103190108_pnas.201103190SI.pdf [file 1103190108_pnas.201103190SI.pdf]

# Supporting Information

Sanei et al. 10.1073/pnas.1103190108

## SI Materials and Methods

**Plant Growth Conditions and Crossing Approaches.** Two genotypes of *Hordeum bulbosum* (Cb2920/4 and Cb3811/3) (1) were vegetatively propagated and vernalized for 7–8 wk at 4 °C, with an 8-h day length. Vegetative propagation is necessary because *H. bulbosum* is self-incompatible (2) and individual genotypes cannot be established from seeds. After vernalization, the two genotypes were maintained separately in cool glasshouses (temperatures <18 °C) with a 16-h day length.

For the *H. vulgare* (“Emir”) plants, two environments were used with contrasting temperatures to control chromosome elimination after pollination. One glasshouse was maintained with temperatures greater than 18 °C for chromosome elimination, whereas the other had temperatures less than 18 °C to promote retention

of the parental chromosomes after pollination with *H. bulbosum*. Plants were cultivated until ear emergence in a cool glasshouse and were then transferred to their respective environments.

Crossing was done conventionally by emasculating florets of the female parent before anthesis; the spikes covered with bags to prevent out-pollination and pollinated with freshly collected pollen from the male parent. A fine spray of plant growth regulators was applied to florets 1 d (summer) or 1 and 2 d (winter) after pollination to stimulate seed development and improve the quality of the seeds. The mixture comprised 75 mg/L gibberellic acid plus 1 mg/L dicamba, with or without 2 mg/L 2,4-dichlorophenoxyacetic acid. Twelve drops per liter of Tween 20 was added as a surfactant. Immature embryos of various sizes were excised under a stereomicroscope for further analysis.

1. Sanei M, et al. (2010) Interspecific hybrids of *Hordeum marinum* ssp. *marinum* x *H. bulbosum* are mitotically stable and reveal no gross alterations in chromatin properties. *Cytogenet Genome Res* 129:110–116.

2. Bothmer R, Salomon B, Linde-Laursen I (1995) Variation for crossability in a reciprocal, interspecific cross involving *Hordeum vulgare* and *H. lechleri*. *Euphytica* 84:183–187.

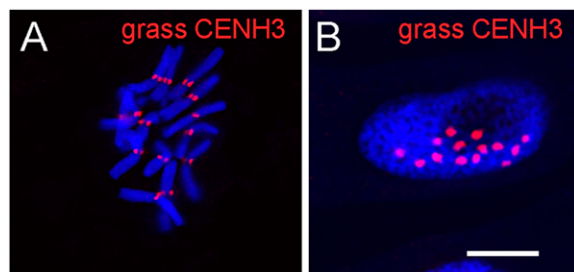

**Fig. S1.** Confirmation of anti-grass CENH3 cross-reactivity with CENH3s of *H. bulbosum* by indirect immunostaining. Immunostaining of metaphase (A) and interphase (B) nuclei of *H. bulbosum* with anti-grass CENH3. (Scale bar: 10  $\mu$ m.)

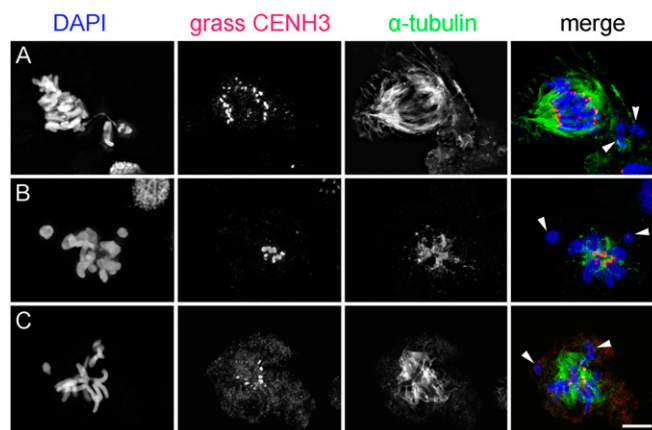

**Fig. S2.** *H. vulgare* x *H. bulbosum* hybrid anaphase cells show lagging chromosomes (arrowheads). (A), (B), and (C) show different examples. Immunostaining with anti-grass CENH3 and anti- $\alpha$ -tubulin. (Scale bar: 10  $\mu$ m.)

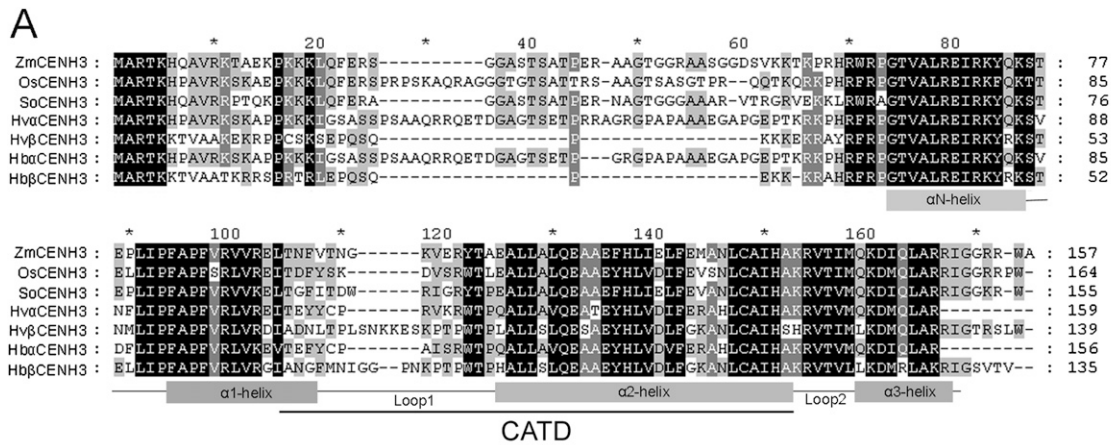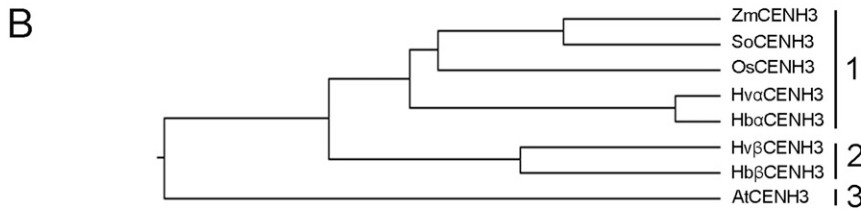

**Fig. 53.** Comparison of  $\alpha$ CENH3 and  $\beta$ CENH3 of *H. vulgare* and of *H. bulbosum* with CENH3s of maize, rice, and sugar cane. Hb, *H. bulbosum*; Hv, *H. vulgare*; Os, rice; So, sugar cane; Zm, maize. (A) Alignment of deduced amino acid sequences. The CENH3-typical  $\alpha$ N-helix,  $\alpha$ 1-helix,  $\alpha$ 2-helix,  $\alpha$ 3-helix, loop 1 region, and CAT domain are indicated. (B) Phylogenetic analysis shows that the  $\alpha$ CENH3s form a distinct subcluster with the CENH3s of maize, rice, and sugar cane.  $\beta$ CENH3s of *Hordeum* species form a separate cluster. CENH3 of *A. thaliana* was used as an outgroup. At, *A. thaliana*.



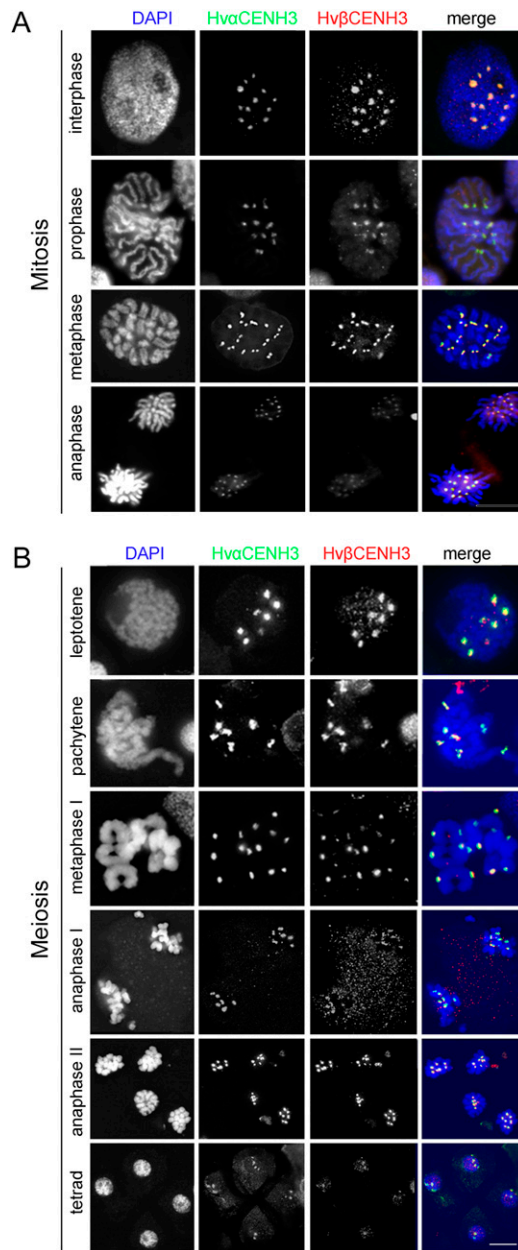

**Fig. S6.** Distribution of  $\alpha$ CENH3 and  $\beta$ CENH3 at different stages of mitosis (A) and meiosis (B) in *H. vulgare* is demonstrated by immunostaining. (Scale bars: 10  $\mu$ m.)





indicate chromosome 7H of *H. bulbosum* (D) Transcription and cross-species incorporation analysis of  $\alpha$ CENH3 and  $\beta$ CENH3 of *H. vulgare* in a wheat-barley double-disomic 1H + 6H addition line. RT-PCR demonstrates transcription of both *CENH3* variants of barley in the addition line. (E) All barley and wheat centromeres incorporate  $\alpha$ CENH3 (*Upper*) but not  $\beta$ CENH3 (*Lower*) of *H. vulgare* despite transcription. Anti-grass CENH3 was used as an internal control. (Scale bar: 10  $\mu$ m.)

**Table S1. List of primers**

| No. | Name of primer     | Sequence 5'—3''               | Annealing temperature, °C |
|-----|--------------------|-------------------------------|---------------------------|
| 1   | Degenerate-F       | GTRGCRCTGCGGGAGATCAGGA        | 68                        |
| 2   | Degenerate-R       | CTBGCRAGYTYATGTCCTTTT         | 61                        |
| 3   | Race-CENH3-F       | GTGGCCACTGCGGGAGATCAGGAAGTACC | 72                        |
| 4   | $\alpha$ Hv + Hb-F | CGGGCACGTCCGAGACTCC           | 69                        |
| 5   | $\alpha$ Hv + Hb-R | GTAGAATTCGGTGACCTCCTTGACC     | 66                        |
| 6   | $\beta$ CENH3-F    | ATGGCTCGCACGAAGAAAACGG        | 64.5                      |
| 7   | $\beta$ CENH3-3'-R | GCAAAGGCCGAGAAGTCAGATG        | 64.5                      |
| 8   | $\alpha$ CENH3-F   | AGAAGAAGATCGGGTCCGCTA         | 64.5                      |
| 9   | $\alpha$ CENH3-R   | GTGCAAACGGGATGAGAAAATT        | 59                        |
| 10  | $\beta$ CENH3-R    | GTCGGCTTGCTCTCCTTCTTGTTCCG    | 68                        |
| 11  | $\beta$ HbCENH3-R  | ATGGCGTCGGCTTGTGGACCC         | 68                        |
| 12  | GAPDH-F            | CAATGATAGCTGCACCACCAACTG      | 59                        |
| 13  | GAPDH-R            | CTAGCTGCCCTTCCACCTCTCCA       | 59                        |

F, forward; R, reverse.
